# Supplementary material for: Dirac nodal surfaces and nodal lines in ZrSiS
Source: PubMed Central journal article supplement — Sci Adv. 2019 May 3;5(5):eaau6459. doi: 10.1126/sciadv.aau6459 (PMC6499591; doi:10.1126/sciadv.aau6459), 2019-05-03
Supplement: aau6459_SM.pdf [file aau6459_SM.pdf]

[advances.sciencemag.org/cgi/content/full/5/5/eaau6459/DC1](https://advances.sciencemag.org/cgi/content/full/5/5/eaau6459/DC1)

## Supplementary Materials for

### **Dirac nodal surfaces and nodal lines in ZrSiS**

B.-B. Fu, C.-J. Yi, T.-T. Zhang, M. Caputo, J.-Z. Ma, X. Gao, B. Q. Lv, L.-Y. Kong, Y.-B. Huang, P. Richard, M. Shi, V. N. Strocov, C. Fang, H.-M. Weng\*, Y.-G. Shi\*, T. Qian\*, H. Ding

\*Corresponding author. Email: [hmweng@iphy.ac.cn](mailto:hmweng@iphy.ac.cn) (H.-M.W.); [ygshi@iphy.ac.cn](mailto:ygshi@iphy.ac.cn) (Y.-G.S.); [tqian@iphy.ac.cn](mailto:tqian@iphy.ac.cn) (T.Q.)

Published 3 May 2019, *Sci. Adv.* **5**, eaau6459 (2019)  
DOI: 10.1126/sciadv.aau6459

#### **This PDF file includes:**

Fig. S1. ARPES data collected with VUV lights.

## Supplementary Materials

### Dirac nodal surfaces and nodal lines in ZrSiS

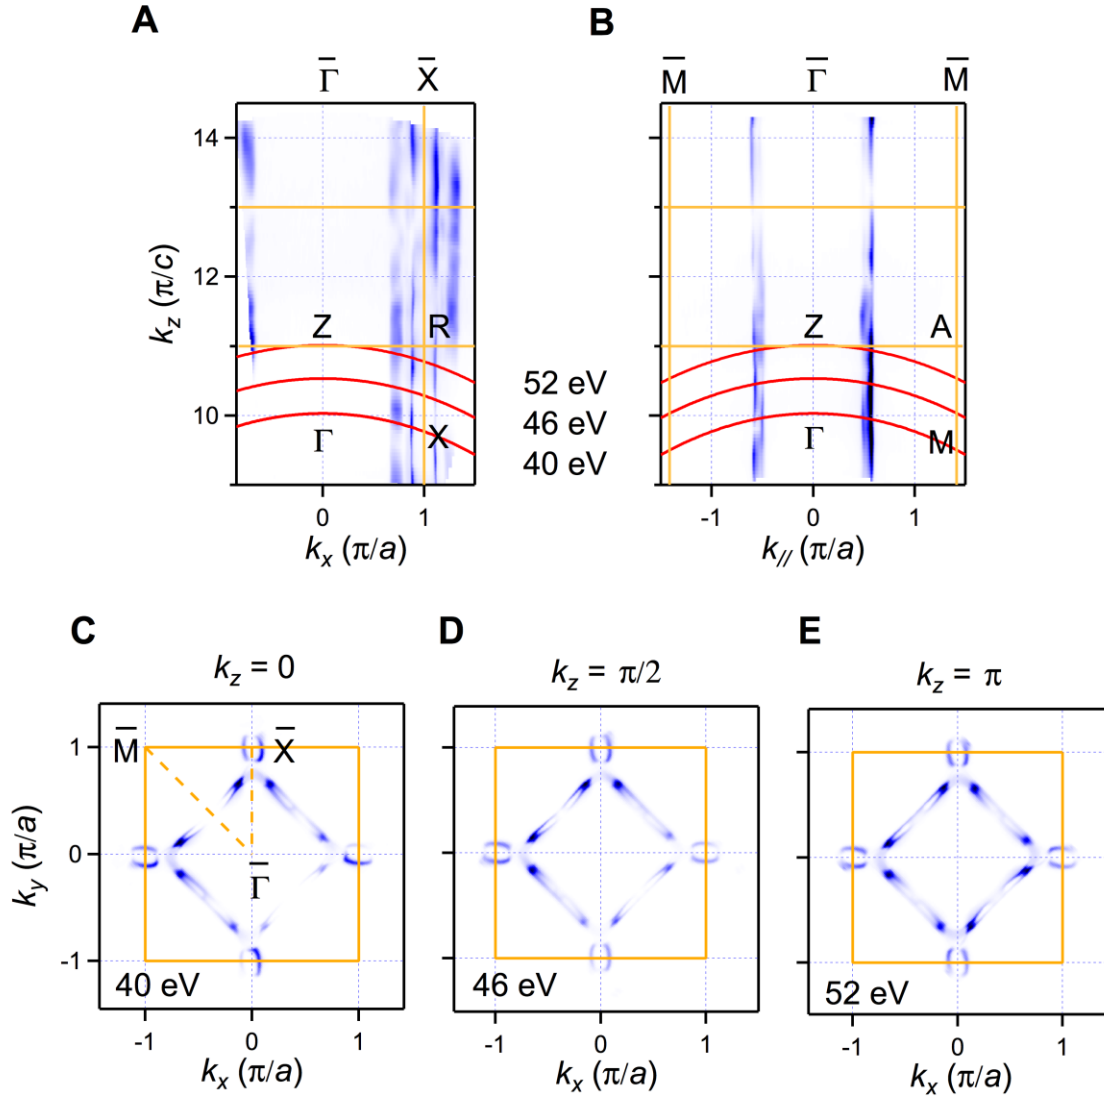

**Fig. S1. ARPES data collected with VUV lights.** (A and B) FSs in the  $\Gamma$ -Z-R-X and  $\Gamma$ -Z-A-M planes, respectively, measured with varying photon energies from 30 to 100 eV. The orange lines indicate the boundary of Brillouin zones. (C to E) FSs measured with  $h\nu = 40, 46,$  and  $52$  eV, respectively.

To illuminate the  $k_z$  dispersions in the angle-resolved photoemission spectroscopy (ARPES) data with vacuum ultraviolet (VUV) lights, we have performed ARPES measurements along  $\Gamma$ -X and  $\Gamma$ -M directions in a range of photon energy ( $h\nu$ ) from 30 to 100 eV. As seen in fig. S1 (A and B), the Fermi surfaces (FSs) measured in the VUV range exhibit straight lines along  $k_z$ , in sharp contrast to

periodic warping in the soft X-ray data in Fig. 3 (C and D). As there are no periodic modulations along  $k_z$  in the VUV data, we calculate the  $k_z$  values with an inner potential of 23 eV, which is extracted from our soft X-ray data, and a lattice constant along  $c$  axis of 8.055 Å. We also measured the FSs with  $h\nu = 40, 46$  and  $52$  eV, approximately corresponding to the  $k_z = 0, \pi/2$ , and  $\pi$  planes, respectively. As seen in fig. S1 (C to E), the measured FSs with VUV lights are almost the same, in sharp contrast to the remarkable changes in the soft X-ray data in Fig. 3 (G and H). The VUV ARPES results in fig. S1 show negligible  $k_z$  dispersions and are well reproduced by our slab calculations of the surface states in Fig. 1F, indicating that the VUV ARPES mainly detects the surface states of ZrSiS.
